# Supplementary material
Source: publisher site journal article supplement (https://www.dovepress.com/get_supplementary_file.php?f=349939.docx)
Supplement: Supplementary file 1 [file get_supplementary_file.php]

**Supplementary Table 1**: Selection criteria.

| **Inclusion criteria** | **Exclusion criteria** |
| --- | --- |
| >18 years | <18 years |
| Barthel scale score ≥ 60 | Barthel scale score <60 |
| VA ≥ 0.3 | VA <0.3 (in the best eye) |
| Stable* retinal pathology that needs follow-up without treatment:  Mild-to-moderate non-proliferative DR  Dry age-related macular degeneration  Retinal vein occlusion  Central serous chorioretinopathy  Choroidal nevus  Hydroxychloroquine retinopathy screening  Epiretinal membrane  Vitelliform lesions  Others: Toxoplasma scar, macular telangiectasias | Patients unsuitable for RVC:  Wheelchair users, those with kyphosis, media opacity, or dementia. |
| Urgent referrals from the DRSS |
| Other ophthalmological diseases that require being seen in an F2F clinic (at the discretion of the ophthalmologist) |
| ** Stable pathology: visual and anatomical stability in 3 consecutive reviews* | |

**Abbreviations**: VA, visual acuity. DRSS, diabetic retinopathy screening service.

**Supplementary Table 2**: Virtual retina clinic outcomes reported by other authors.

|  | **This study**  **(internal referrals)** | **Kortuem et al8**  **(internal referrals)** | **Kortuem et al8**  **(new**  **referrals)** | **Lee et al7**  **(new referrals)** | **Kern et al6**  **(consecutive VRC)** |  |
| --- | --- | --- | --- | --- | --- | --- |
| No. | 481 | 1227 | 168 | 526 | 661 |  |
| F2F clinic referrals (%) | 19.3% | 30.9% | 17.4% | 27.8% | 15% |  |
| Discharged (%) | 6.6% | 14.6% | 45.5% | 28.1% | 15% |  |
| Continued in VRC (%) | 74% | 54.5% | 37.1% | 44.1% | 70% |  |

**Abbreviations:** F2F, face-to-face. VRC, virtual retina clinic.
